# **A randomized stepped wedge trial of an intensive combination approach to roll back the HIV epidemic in Nigerian Adolescents: iCARE Nigeria treatment support protocol**

Babafemi O. Taiwo MBBS, FAS,<sup>1</sup> Lisa M. Kuhns, PhD, MPH<sup>2,3</sup>, Olayinka Omigbodun MBBS, MPH, FAS,<sup>4,5</sup> Olutosin Awolude MBBS, MSc,<sup>6,7</sup> Kehinde M. Kuti MBBS, MSCI,<sup>7,8</sup> Adedotun Adetunji MBChB, MSCI,<sup>9</sup> Baiba Berzins MPH,<sup>1</sup> Patrick Janulis, PhD,<sup>10</sup> Sulaimon Akanmu, MBBS,<sup>11</sup> Oche Agbaji, MBBS, MPH, MD<sup>12</sup> Agatha N. David, MBBS, MPH, FMCP<sup>13</sup> Akinsegun Akinbami, MBChB, MPH, MSc, FMCPATH<sup>14</sup> Abiodun Folashade Adekambi, MBBS, FWACP, MPH<sup>15</sup> Amy K. Johnson, PhD, MSW,<sup>2,3</sup> Ogochukwu Okonkwor, MPH,<sup>1</sup> Bibilola D. Oladeji, MBBS, MSc,<sup>9</sup> Marbella Cervantes, MA,<sup>3</sup> Olubusuyi M. Adewumi, PhD,<sup>16</sup> Bill Kapogiannis MD,<sup>17</sup> Robert Garofalo MD, MPH<sup>2,3</sup>.

<sup>1</sup> Division of Infectious Diseases and Institute for Global Health, Northwestern University, Chicago, USA

<sup>2</sup> Department of Pediatrics, Northwestern University Feinberg School of Medicine, Chicago, USA

<sup>3</sup> Division of Adolescent Medicine, Ann and Robert H Lurie Children's Hospital of Chicago, USA

<sup>4</sup> Department of Child and Adolescent Psychiatry, and Centre for Child and Adolescent Mental Health, College of Medicine, University of Ibadan, Nigeria

<sup>5</sup> Department of Psychiatry, College of Medicine, University of Ibadan, Nigeria

<sup>6</sup> Department of Obstetrics and Gynecology, College of Medicine, University of Ibadan, Nigeria

<sup>7</sup> Infectious Disease Institute, College of Medicine, University of Ibadan, Nigeria

<sup>8</sup> Staff Medical Services Department, University College Hospital, Ibadan, Nigeria

<sup>9</sup> Department of Family Medicine, University College Hospital, Ibadan, Nigeria

22 <sup>10</sup>Department of Medical Social Sciences, Northwestern University, Chicago, USA

23 <sup>11</sup> Lagos University Teaching Hospital, Lagos, Nigeria

24 <sup>12</sup> Department of Medicine, University of Jos and Jos University Teaching Hospital, Jos, Nigeria

25 <sup>13</sup> Nigerian Institute of Medical Research, Lagos, Nigeria

26 <sup>14</sup> Lagos State University College of Medicine, Ikeja, Nigeria

27 <sup>15</sup> Department of Paediatrics, Olabisi Onabanjo University and Olabisi Onabanjo University Teaching Hospital,  
28 Ogun State, Nigeria

29 <sup>16</sup> Department of Virology, College of Medicine, University of Ibadan, Ibadan, Nigeria

30 <sup>17</sup> Eunice Kennedy Shriver National Institute of Child Health and Human Development, Bethesda, Maryland,  
31 USA

32 **Corresponding Author:**

33 Babafemi O. Taiwo, MBBS, FAS

34 E-mail address: [b-taiwo@northwestern.edu](mailto:b-taiwo@northwestern.edu)

35

## 36 ABSTRACT (295 words)

37 Background: Nigeria is one of six countries with half the global burden of youth living with HIV. Interventions  
38 to date have been inadequate as AIDS-related deaths in Nigeria's youth have remained unchanged in recent  
39 years. The iCARE Nigeria HIV treatment support intervention, a combination of peer navigation and SMS text  
40 message medication reminders to promote viral suppression, demonstrated initial efficacy and feasibility in a  
41 pilot trial among youth living with HIV in Nigeria. This paper describes the study protocol for the large-scale  
42 trial of the intervention.

43 Methods: The iCARE Nigeria-Treatment study is a randomized stepped wedge trial of a combination (peer  
44 navigation and text message reminder) intervention, delivered to youth over a period of 48 weeks to promote  
45 viral suppression. Youth receiving HIV treatment at six clinical sites in the North Central and South Western  
46 regions of Nigeria were recruited for participation. Eligibility criteria included registration as a patient at  
47 participating clinics, aged 15-24 years, on antiretroviral therapy for at least three months, ability to understand  
48 and read English, Hausa, Pidgin English, or Yoruba, and intent to remain a patient at the study site during the  
49 study period. The six clinic sites were divided into three clusters and randomized to a sequence of control and  
50 intervention periods for comparison. The primary outcome is plasma HIV-1 viral load suppression, defined as  
51 viral load  $\leq 200$  copies/mL, in the intervention period versus the control period at 48 weeks of intervention.

52 Discussion: Evidence-based interventions to promote viral load suppression among youth in Nigeria are needed.  
53 This study will determine efficacy of a combination intervention (peer navigation and text message reminder)  
54 and collect data on potential implementation barriers and facilitators to inform scale-up if efficacy is confirmed.

55 Trial registration: ClinicalTrials.gov number, NCT 04950153, retrospectively registered July 6, 2021,

56 <https://clinicaltrials.gov/>.

## 58 Introduction (3,023 words)

59 Since 2016, guidelines in Nigeria, Africa's most populous country, have recommended antiretroviral therapy  
60 (ART) regardless of CD4 cell count for all people with HIV.(1) Effective ART suppresses HIV-1 replication,  
61 which curbs AIDS-related morbidity and mortality, limits viral transmission, and is essential to end the  
62 epidemic.(2-4) Youth in Nigeria have not benefited from ART as much as adults.(5-8) The United Nations  
63 defines youth as individuals aged 15-24, in recognition of the developmental risks to health and well-being of  
64 mid-to-late adolescence and young adulthood(9) and has called for their prioritization in national HIV treatment  
65 strategies.(10) An estimated 180,000 youth ages 15-24 are living with HIV in the country, with 23,000 new  
66 infections in 2020.(11) Viral load suppression is estimated to be approximately 43% across age groups,  
67 however, it is significantly lower among youth and younger adults (aged less than 34 years).(12) In 2020, an  
68 estimated 3,000 youth died of AIDS-related causes in Nigeria.(11) Effective interventions to promote ART  
69 adherence and suppression of HIV-1 viremia are needed to ultimately end the epidemic among vulnerable  
70 youth.

71  
72 Peer support, which shifts supportive care to community-based and non-professional providers for efficient use  
73 of resources,(13, 14) is recommended by the World Health Organization as a strategy that provides many  
74 benefits for youth across the HIV care continuum. (15) Peer support can also motivate and reinforce self-care  
75 and help to build self-efficacy for HIV treatment. (15) In addition, mobile technology-based strategies  
76 (mHealth) have emerged as a promising approach to deliver HIV-related interventions, particularly among  
77 youth, with a growing body of evidence suggesting efficacy.(16-18) Approaches using mHealth have the  
78 advantage of simple interfaces for users, accessibility anywhere mobile telephone signals and/or Wi-Fi are  
79 available, relative affordability, and have been promoted specifically to reach stigmatized and disenfranchised  
80 populations.(19, 20) An SMS text message reminder intervention, the Treatment Text intervention (TXTXT),  
81 developed by members of our research team has shown evidence of both feasibility and efficacy to promote  
82 ART adherence among youth with HIV in the United States (US) (21). Based on social cognitive theory (22,

23), TXTXT is a bi-directional and personalized reminder intervention to promote medication adherence, which incorporates environmental cues to action and self-management support and feedback.

The iCARE Nigeria initiative includes both an HIV treatment support intervention and an HIV testing promotion intervention (parallel combination interventions). Herein, we describe the treatment support intervention of iCARE Nigeria (iCARE-Treatment), which incorporates locally adapted peer navigation and TXTXT to directly support youth living with HIV and promote viral suppression and is being tested via the UG3/UH3 mechanism, funded by the US National Institutes of Health (NIH). In the UG3 pilot phase of the study, iCARE-Treatment was piloted in a 48-week pre-post trial; participants (N=40) were 50% male, mean age 19.9 years (range=15-24), and 55% perinatally infected. Viral suppression (defined as viral load  $\leq$  200 copies/mL) was 35% at baseline and increased to 68% at 24 weeks and 60% at 48 weeks. These increases correspond to an odds ratio (OR) =14.0 and OR=6.0, at 24 and 48 weeks, respectively (p values<.05). Participants reported high satisfaction, with 100% indicating that they were satisfied/mostly satisfied with the intervention and 100% would refer a friend to receive it.(24)

## Study objectives

The purpose of this study is to assess the efficacy of iCARE-Treatment, a combination peer navigation and text message medication reminder intervention, on viral suppression among youth living with HIV, aged 15-24. Secondary objectives are to assess intervention effects on ART adherence and retention in HIV care.

## 103 Materials and Methods

### 104 Design

105 The protocol described herein is presented following the SPIRIT guidelines with related checklist (Figure 1).

106 This study is a randomized stepped wedge trial among six clinical sites in Nigeria. The sites were divided into

107 three clusters consisting of one, three, and two sites respectively. The Cluster 1 sites include the Infectious

108 Disease Institute of the College of Medicine, University of Ibadan (IDI/CoMUI); Cluster 2 sites include Lagos

109 State University Teaching Hospital (LASUTH), Lagos University Teaching Hospital (LUTH), Nigerian

110 Institute of Medical Research (NIMR); and Cluster 3 sites include Jos University Teaching Hospital (JUTH)

111 and Olabisi Onabanjo University Teaching Hospital (OOUTH). In addition, IDI/CoMUI and LASUTH have 1

112 and 3 affiliate clinics linked to the sites, respectively, and LUTH, NIMR, JUTH and OOUTH have 2 each. The

113 study duration of 96 weeks consists of four 24-week periods, which include control (pre-intervention),

114 intervention, or follow-up (post-intervention) conditions. Per the stepped wedge design (Figure 2), there are

115 three different sequences: 1) two 24-week intervention periods then two follow-up periods (no control period);

116 2) one 24-week control period followed by two intervention periods then one follow-up period; 3) two 24-week

117 control periods followed by two intervention periods (no follow-up period). Thus, each sequence includes 48

118 continuous weeks of the iCARE-treatment intervention, which consists of peer navigation and support

119 combined with daily text message medication reminders (TXTXT). The control and follow-up periods are

120 observational, with collection of data only, while receiving standard care.

### 121 Identification and recruitment of participants

122 Participants were recruited from youth patients at each clinical site. Individuals were eligible if they were: (a)

123 living with HIV, (b) a registered patient at a clinical site, (c) aged 15 to 24 years (emancipated or with parental

124 permission if aged 15), (d) on ART for at least three months and (e) able to understand and read basic English,

125 Hausa, Pidgin English or Yoruba, (f) willing and able to provide informed assent or consent, and (g) intending

126 to remain a patient in the study clinic during the study period (up to 96 weeks). Individuals were excluded if

127 they were: (a) unable to provide informed assent or consent; (b) aged 15 years and are not emancipated or do  
128 not have parental permission for participation.

## 130 Randomization

131 After the completion of initial enrollment, clusters were randomized to a sequence. Randomized sequences were  
132 concealed from participants and study staff until enrollment was completed. The random assignments were  
133 generated by a computerized random number generator by the Statistician (PJ). Clusters 2 and 3 were  
134 randomized to the sequence with one or two initial control periods (data collection only), respectively, followed  
135 by two intervention periods. Given the complexities of analysis, the statistician will not be blinded during  
136 statistical analyses.

137 Cluster 1 was not randomized but began the intervention at the point of enrollment, which was purposeful as  
138 this was a test site for the original UG3 pilot trial of the intervention and thus had staff ready and trained to  
139 begin the intervention at the start of the study period. The final sequence of the four 24-week periods in each  
140 cluster is shown in Figure 2. A two-day training was conducted with investigators and staff of clusters 2 and 3  
141 after their initial control period (s), immediately prior to intervention deployment (staggered by start date). This  
142 was then followed by intensive step-down trainings at each cluster site with all staff and peer navigators  
143 (including alternate/replacement peer navigators), to prepare them to deliver the intervention.

## 144 **Figure 1. SPIRIT Checklist**

## 145 **Figure 2. iCARE Study Schema**

## 147 Description of the intervention period: iCARE-Treatment

148 The iCARE-Treatment intervention includes peer navigation and daily text message medication reminders.  
149 After assessment of the participant's needs and development of an action plan, peer navigators make at least one

150 contact (in-person or phone) every two weeks with participants to support goals of the action plan. Peer support  
151 is designed to be dynamic and flexible, with support provided via text message, WhatsApp message, and phone  
152 calls and includes accompaniment to the clinic, assistance with medication pick-up, and other health-related  
153 appointments, as needed. Peer navigators also work with the study coordinator, project manager and  
154 investigators to facilitate referrals to mental health and other services and provide general peer support. Peer  
155 navigators are selected based on recommendations from their HIV care providers. Requirements for this role  
156 include living with HIV and being virologically suppressed in the prior 12-month period (or the last available  
157 viral load measurement), clinically stable according to their physician’s subjective assessment, and aged 18-30  
158 years. Age range and other targeted attributes of peer navigators are informed by findings from formative  
159 research conducted in youth and other stakeholders prior to the UG3 pilot study. Based on findings from the  
160 UG3 adaptation and pilot study,(25) we expected to match each peer navigator to 4-5 study participants with  
161 salient shared characteristics, such as gender, age group, residential location, education level, religion, and  
162 other social characteristics (e.g., marital status, motherhood). Peer navigators receive a monthly stipend to cover  
163 cost of transportation and telephone/text messaging plus honorarium for their time. The total amount provided  
164 as stipend is based on results of our preparatory stakeholder engagement activities and consistent with local  
165 standards.

166 The text message reminder intervention is an mHealth intervention using the TXTXT platform, designed and  
167 tested with evidence of efficacy in our prior work in the US.(21, 26) This intervention includes a youth-  
168 centered, personalized, and bidirectional set of three daily messages to support adherence. The daily text  
169 messages include a personalized initial medication reminder that coincides with the participant’s chosen time to  
170 take their antiretroviral regimen, followed by a second message 15 minutes later, asking whether they took their  
171 medication, with a request for reply (“yes” or “no”). An encouraging third automated message, from our text  
172 message library, is then triggered by their reply. Both the initial and follow-up messages are chosen by each  
173 youth and personalized to reflect content meaningful to them. To protect confidentiality, messages are worded  
174 in a way that would not reveal the participant’s HIV status if read by a third party. In the UG3 study, youth



175 living with HIV worked with study staff to adapt the text message library to ensure it contained expressions  
176 understood and commonly used by youth locally. The text messages are delivered via the Dimagi Commcare  
177 platform (<https://www.dimagi.com/commcare/>). Participants use their own phones for text messaging;  
178 however, a phone is provided to participants who do not have access to a phone, which is anticipated to be less  
179 than 20% of participants. Participants also receive 100 Nigerian Naira per week during the intervention period  
180 to cover the (minimal) costs of text messages (i.e., “airtime”).

### 181 Control period:

182 During the pre-intervention control periods, study participants receive standard-of-care (SOC) adherence  
183 counseling only. In Nigeria, per national guidelines,(27) SOC adherence counseling includes a readiness  
184 assessment at initiation of ART to emphasize both the benefits of medication adherence and also the  
185 consequences of poor adherence, including virological failure; the development of a patient-centered adherence  
186 strategy, and on-going monitoring. Two consecutive viral load test results above 1000 copies/mL, at least 3  
187 months apart, triggers enhanced adherence counseling which includes exploration of specific barriers to  
188 adherence and development of an adherence intervention plan with follow-up at 3-month intervals.

### 189 Follow-up period:

190 This is the post-intervention period when daily text messaging and protocol-specified peer navigation are  
191 discontinued, and participants return to standard care.

### 193 Study Assessments

194 Participants are consented by study staff at the enrollment visit and complete interviewer-administered  
195 computerized study assessments at each visit, at 24-week intervals, captured in REDCap (see Table 1 for full  
196 schedule of activities). Study consent includes permission for use of participant data and samples for future  
197 studies. The longitudinal module of REDCap with survey queue and scheduling modules is used for both survey  
198 data collection and entry of data from case report forms, anchored to the enrollment date. All study data are

securely stored at Northwestern University in a limited access database by study ID. All hard copy participant information (e.g., study checklists, consent forms) are securely stored at each study site in locked file cabinets with limited access. Study enrollment and data collection procedures are monitored annually by contractual arrangement with a third-party monitor, arranged by the study sponsor.

| <b>Table 1. iCARE Nigeria Treatment Intervention Schedule of Activities</b>                                 |                                                                                                                                                                                                                                                                                                                                                                                                                                                                                                                                                                                                                                                                                                                                                                                                                                                                                                      |                                            |                             |                              |                   |
|-------------------------------------------------------------------------------------------------------------|------------------------------------------------------------------------------------------------------------------------------------------------------------------------------------------------------------------------------------------------------------------------------------------------------------------------------------------------------------------------------------------------------------------------------------------------------------------------------------------------------------------------------------------------------------------------------------------------------------------------------------------------------------------------------------------------------------------------------------------------------------------------------------------------------------------------------------------------------------------------------------------------------|--------------------------------------------|-----------------------------|------------------------------|-------------------|
|                                                                                                             | Pre-intervention (Control Sites)                                                                                                                                                                                                                                                                                                                                                                                                                                                                                                                                                                                                                                                                                                                                                                                                                                                                     | Baseline (Intervention Phase) Intervention | Week 24- Intervention Phase | Week 48 – Intervention Phase | Post-intervention |
| Informed consent                                                                                            | X                                                                                                                                                                                                                                                                                                                                                                                                                                                                                                                                                                                                                                                                                                                                                                                                                                                                                                    | X                                          |                             |                              |                   |
| Blood draw for viral load                                                                                   | X                                                                                                                                                                                                                                                                                                                                                                                                                                                                                                                                                                                                                                                                                                                                                                                                                                                                                                    | X                                          | X                           | X                            | X <sup>a</sup>    |
| Blood draw for CD4 count                                                                                    | X <sup>b</sup>                                                                                                                                                                                                                                                                                                                                                                                                                                                                                                                                                                                                                                                                                                                                                                                                                                                                                       | X <sup>b</sup>                             |                             |                              |                   |
| Blood draw for future studies (stored; virologic resistance testing and other studies)                      | X                                                                                                                                                                                                                                                                                                                                                                                                                                                                                                                                                                                                                                                                                                                                                                                                                                                                                                    | X                                          | X                           | X                            |                   |
| Adherence Assessment: Dried Blood Spot (DBS), Pharmacy Pick-up Records Abstraction,(28, 29) Self-Report(30) | X                                                                                                                                                                                                                                                                                                                                                                                                                                                                                                                                                                                                                                                                                                                                                                                                                                                                                                    | X                                          | X                           | X                            | X <sup>c</sup>    |
| Computer Assisted Personal Interviewing Questionnaires <sup>d</sup>                                         | X                                                                                                                                                                                                                                                                                                                                                                                                                                                                                                                                                                                                                                                                                                                                                                                                                                                                                                    | X                                          | X                           | X                            |                   |
| Implementation Assessment <sup>e</sup>                                                                      | X                                                                                                                                                                                                                                                                                                                                                                                                                                                                                                                                                                                                                                                                                                                                                                                                                                                                                                    | X                                          | X                           | X                            | X                 |
| Cost Assessment <sup>f</sup>                                                                                | X                                                                                                                                                                                                                                                                                                                                                                                                                                                                                                                                                                                                                                                                                                                                                                                                                                                                                                    | X                                          | X                           | X                            | X                 |
| <b>SMS + Peer Navigation</b>                                                                                |                                                                                                                                                                                                                                                                                                                                                                                                                                                                                                                                                                                                                                                                                                                                                                                                                                                                                                      | Baseline through week 48                   |                             |                              |                   |
| SMS Text Initiation                                                                                         |                                                                                                                                                                                                                                                                                                                                                                                                                                                                                                                                                                                                                                                                                                                                                                                                                                                                                                      | X                                          |                             |                              |                   |
| Peer Navigation Enrollment                                                                                  |                                                                                                                                                                                                                                                                                                                                                                                                                                                                                                                                                                                                                                                                                                                                                                                                                                                                                                      | X                                          |                             |                              |                   |
|                                                                                                             |                                                                                                                                                                                                                                                                                                                                                                                                                                                                                                                                                                                                                                                                                                                                                                                                                                                                                                      |                                            |                             |                              |                   |
|                                                                                                             | <sup>a</sup> Per medical chart abstraction of standard of care viral load quantification<br><sup>b</sup> CD4 quantification will be performed only at the first study visit (either pre-intervention in Jos, Lagos, Sagamu), or baseline (in Ibadan)<br><sup>c</sup> Medical records abstraction only (no self-report, no DBS)<br><sup>d</sup> Computer assisted personal interviewing (CAPI): Demographic Characteristics, HIV treatment knowledge,(31) HIV medication self-efficacy(32), HIV stigma,(33) depressive symptoms,(34) alcohol and drug use,(35) intervention satisfaction and acceptability(36)<br><sup>e</sup> RE-AIM framework implementation strategies,(37) contextual factors from the Consolidated Framework for Implementation Research (CFIR).(38)<br><sup>f</sup> Includes abstraction of cost data from site administrative records and through interviews with stakeholders |                                            |                             |                              |                   |

Primary outcome: viral load suppression is defined as plasma viral load < 200 copies/mL. Blood for viral load quantification is collected via venipuncture at each study visit. Viral load quantification is performed at study laboratories using real-time HIV-1 COBAS® assay (Roche Molecular Systems, Inc.) with a lower detection limit of 20 copies/mL.

Secondary outcomes:

Retention in HIV care is defined as at least two medical visits in a 24-week study period (39), with clinic visits abstracted from the medical record. ART adherence is measured via self-report, pharmacy records, and quantification of antiretroviral drug levels in dried blood spots (DBS). Self-reported adherence is measured as

223 30-day adherence on a visual analogue scale (VAS) of 0 to 100.(30) Pharmacy records are captured as part of  
224 routine care in the electronic medical record. Drug pick-up adherence based on medication possession ratio  
225 (MPR) will be calculated from pharmacy records,(28, 29) using drug pick-up records over each 24-week period,  
226 as total number of days' supply obtained including the last fill, divided by number of days between first fill and  
227 last day of the observation window (40). Five 50 $\mu$ L blood spots are collected on protein saver cards (DBS) for  
228 measurement of antiretroviral drug levels. The samples are dried out at room temperature for 24 hours, then  
229 sealed tightly with desiccant and a humidity indicator, and stored at -20 degrees Celsius until analysis. Clinic  
230 visit and pharmacy records are abstracted from medical records onto case report forms and entered in REDCap.  
231 Both VAS and MPR values will be evaluated as dichotomous indicators of  $\geq 90\%$  adherence (good) or  $< 90\%$   
232 adherence (poor).(41)

## 234 Statistical analysis

235 Several data quality checks will be conducted prior to analysis, including analysis of descriptive statistics and  
236 graphic plots to detect appropriate range of variables and to detect missing data or invalid cases. All data are  
237 stored in a password-protected network server with daily back-up. For descriptive statistics, percentages will be  
238 presented for dichotomous outcomes (e.g., viral suppression vs. non-suppression) and means will be presented  
239 for continuous outcomes (e.g., medication adherence). Similarly, changes between intervention and control  
240 periods will be summarized via odds ratios. Generalized estimating equations (GEE) will be used to account for  
241 multiple observations of participants. A binomial distribution and logit link function will be used to evaluate the  
242 statistical significance of the intervention effect, while controlling for secular trends in the outcomes over time  
243 and clustering within clusters. This analysis will follow the principles of intention-to-treat analysis and will be  
244 evaluated by examining the statistical significance of the regression coefficient for the intervention on the  
245 primary outcome. For differences in viral load suppression, we will compare intervention and control periods at

246 the end of the intervention period, i.e., 48 weeks. Data collected during the follow-up period will be analyzed to  
247 explore the durability or “post-dose effect” of the intervention.

## 249 Sample size calculation

250 With a small to moderate within cluster correlation and moderate individual autocorrelation (0.50), this analysis  
251 will have adequate power (power = 0.945) to detect an OR of 1.5 in the proportion of participants achieving viral  
252 suppression with at least 90 participants per site.

253 Primary study data will be analyzed as soon as possible after the end of data collection, with study findings  
254 disseminated in peer-review public health journals.

## 256 Discussion

257 We describe herein the design of a stepped wedge trial of the iCARE-Treatment intervention, a combination of  
258 peer navigation and text message reminders to promote viral suppression among youth living with HIV in  
259 Nigeria, aged 15-24 years. The intervention draws on evidence-based intervention approaches that we adapted  
260 to the Nigerian context through broad stakeholder input in the formative stage of study design. Following the  
261 pre-post pilot trial in the UG3 phase of this study with evidence of initial efficacy and feasibility, we sought to  
262 extend the evidence from the UG3 to a much larger sample in the UH3 study described herein. The design of  
263 this UH3 study has several additional strengths, including inclusion of youth living with HIV in multiple states  
264 and regions of Nigeria, using a practical stepped wedge design that ensures every cluster receives the  
265 intervention, and incorporating a combination of evidence-based intervention approaches.

266  
267 iCARE-Treatment is among the first interventions to be tested in a rigorous trial of sufficient size to detect  
268 effects on ART outcomes in youth. Effective interventions are needed urgently, particularly in a country like

269 Nigeria that has met none of the key metrics recommended by Joint United Nations Programme on HIV/AIDS  
270 (UNAIDS) for measuring progress in reducing the public health threat of HIV.(11, 42) Illustratively, AIDS-  
271 related deaths from 2010 to 2020 fell by only 28% compared to the target of 75% decline.(11) Since youth are  
272 known to fare worse than older persons on the cascade of HIV care,(43, 44) interventions like iCARE-  
273 Treatment are needed to improve viral suppression in youth; sustained viral suppression is the gateway to lower  
274 morbidity and mortality and elimination of viral transmission.(45-47) In designing this UH3 trial, our team is  
275 mindful of the need to understand potential barriers to broad adoption and scale-up of the iCARE-Treatment  
276 intervention should the results from the UG3 pilot be replicated in the UH3 study. As such, we intend to collect  
277 data on potential implementation barriers and facilitators, including cost implications, during the UH3 study and  
278 provide public health collaborators and policy makers with a comprehensive summary of evidence at the end of  
279 the study.

280

281

282

## 283 Acknowledgements

284 We would like to thank members of the iCARE team at all study sites for their contribution to the study  
285 protocol and procedures. This publication was supported by funding from the Eunice Kennedy Shriver National  
286 Institute of Child Health & Human Development of the National Institutes of Health under Award Number  
287 UH3HD096920. The content is solely the responsibility of the authors and does not necessarily represent the  
288 official views of the National Institutes of Health. Research reported in this publication was also supported by  
289 the Fogarty International Center of the National Institutes of Health under Award Number D43TW009608, and  
290 by the National Institutes of Health's National Center for Advancing Translational Sciences, Grant Number  
291 UL1TR001422. The funding source has no role in the original design of this study, analysis and interpretation  
292 of data, or decision to submit results.

## 293 **Ethics approval**

294 This protocol has been approved by the Institutional Review Boards of Northwestern University  
295 (STU00214317-CR0001), Ann & Robert H. Lurie Children's Hospital of Chicago, College of Medicine,  
296 University of Ibadan/University College Hospital; Lagos State University Teaching Hospital, Lagos University  
297 Teaching Hospital, Nigerian Institute of Medical Research; Jos University Teaching Hospital and Olabisi  
298 Onabanjo University Teaching Hospital respectively, with a waiver of parental permission for participation of  
299 minors (aged 16-17). Current protocol version: March 11, 2022. Any modifications to the protocol are  
300 submitted to and approved by the IRBs of Record prior to implementation. Spontaneously reported adverse  
301 events and unintended effects of the trial are tracked by the study Principal Investigators and reported to the  
302 IRBs of Record. Study participants complete a written informed assent or consent process prior to participation  
303 in research activities. This study is monitored by a Data Safety and Monitoring Board (DSMB), the composition  
304 of which may be obtained from the study Principal Investigator at the lead institution. The trial will be

305 suspended or stopped if recommended by the DSMB and the study investigators, in consultation with the study  
306 sponsor, determine that, in their clinical opinion, there are risks to participants for continuation.

307

308

### 309 **Availability of data**

310 Trial data will be archived and publicly available at the National Institute of Child Health and Human  
311 Development Data and Specimen Hub.

312

### 313 **Authors' contributions**

314 BT, RG and LK contributed to the design of all aspects of the study. All authors contributed to the study design  
315 and selection of measures. PJ designed the proposed data analysis. BT, RB and LK drafted the manuscript. The  
316 manuscript has been read and approved by all authors.

317

318

319

320

321

322

323

## References

- 324 1. Federal Ministry of Health of Nigeria. National guidelines for HIV prevention, treatment and care, 2016. 2016.
- 325 2. Cohen MS, Chen YQ, McCauley M, Gamble T, Hosseinipour MC, Kumarasamy N, et al. Prevention of HIV-1  
326 infection with early antiretroviral therapy. *The New England journal of medicine*. 2011;365(6):493-505.
- 327 3. Insight Start Study Group, Lundgren JD, Babiker AG, Gordin F, Emery S, Grund B, et al. Initiation of  
328 Antiretroviral Therapy in Early Asymptomatic HIV Infection. *The New England journal of medicine*. 2015;373(9):795-  
329 807.
- 330 4. Temprano Anrs Study Group, Danel C, Moh R, Gabillard D, Badje A, Le Carrou J, et al. A Trial of Early  
331 Antiretrovirals and Isoniazid Preventive Therapy in Africa. *The New England journal of medicine*. 2015;373(9):808-22.
- 332 5. Auld AF, Agolory SG, Shiraishi RW, Wabwire-Mangen F, Kwesigabo G, Mulenga M, et al. Antiretroviral  
333 therapy enrollment characteristics and outcomes among HIV-infected adolescents and young adults compared with older  
334 adults--seven African countries, 2004-2013. *MMWR Morb Mortal Wkly Rep*. 2014;63(47):1097-103.
- 335 6. DeSilva MB, Merry SP, Fischer PR, Rohrer JE, Isichei CO, Cha SS. Youth, unemployment, and male gender  
336 predict mortality in AIDS patients started on HAART in Nigeria. *AIDS Care*. 2009;21(1):70-7.
- 337 7. Mark D, Armstrong A, Andrade C, Penazzato M, Hatane L, Taing L, et al. HIV treatment and care services for  
338 adolescents: a situational analysis of 218 facilities in 23 sub-Saharan African countries. *J Int AIDS Soc*. 2017;20(Suppl  
339 3):21591.
- 340 8. UNAIDS. Fast Track-Ending the AIDS Epidemic by 2030. Geneva, Switzerland: Joint United Nations  
341 Programme on HIV/AIDS; 2014.
- 342 9. United Nations General Assembly. Convention on the rights of the child. New York, NY: United Nations; 1989.
- 343 10. UNAIDS. Young people and HIV. [unaids.org](http://unaids.org): Joint United Nations Programme on HIV/AIDS (UNAIDS); 2021.
- 344 11. AIDSinfo [Internet]. UNAIDS. 2020 [cited December 6, 2021].
- 345 12. NAIIS Consortium. Nigeria HIV/AIDS Indicator and Impact Survey: National Summary Sheet. 2019.
- 346 13. Simoni JM, Nelson KM, Franks JC, Yard SS, Lehavot K. Are peer interventions for HIV efficacious? A  
347 systematic review. *AIDS Behav*. 2011;15(8):1589-95.
- 348 14. Genberg BL, Shangani S, Sabatino K, Rachlis B, Wachira J, Braitstein P, et al. Improving Engagement in the HIV  
349 Care Cascade: A Systematic Review of Interventions Involving People Living with HIV/AIDS as Peers. *AIDS Behav*.  
350 2016;20(10):2452-63.
- 351 15. World Health Organization. HIV and adolescents: Guidance for HIV testing and counselling and care for  
352 adolescents living with HIV. Geneva, Switzerland: World Health Organization; 2013.
- 353 16. Mulawa MI, LeGrand S, Hightow-Weidman LB. eHealth to Enhance Treatment Adherence Among Youth Living  
354 with HIV. *Curr HIV/AIDS Rep*. 2018;15(4):336-49.
- 355 17. Cao B, Gupta S, Wang J, Hightow-Weidman LB, Muessig KE, Tang W, et al. Social Media Interventions to  
356 Promote HIV Testing, Linkage, Adherence, and Retention: Systematic Review and Meta-Analysis. *J Med Internet Res*.  
357 2017;19(11):e394.
- 358 18. Schnall R, Travers J, Rojas M, Carballo-Diequez A. eHealth interventions for HIV prevention in high-risk men  
359 who have sex with men: a systematic review. *J Med Internet Res*. 2014;16(5):e134.
- 360 19. Catalani C, Philbrick W, Fraser H, Mechael P, Israelski DM. mHealth for HIV Treatment & Prevention: A  
361 Systematic Review of the Literature. *Open AIDS J*. 2013;7:17-41.
- 362 20. Devi BR, Syed-Abdul S, Kumar A, Iqbal U, Nguyen PA, Li YC, et al. mHealth: An updated systematic review  
363 with a focus on HIV/AIDS and tuberculosis long term management using mobile phones. *Comput Methods Programs  
364 Biomed*. 2015;122(2):257-65.
- 365 21. Garofalo R, Kuhns LM, Hotton A, Johnson A, Muldoon A, Rice D. A Randomized Controlled Trial of  
366 Personalized Text Message Reminders to Promote Medication Adherence Among HIV-Positive Adolescents and Young  
367 Adults. *AIDS Behav*. 2016;20(5):1049-59.
- 368 22. Bandura A. The anatomy of stages of change. *Am J Health Promot*. 1997;12(1):8-10.
- 369 23. Bandura A. Health promotion by social cognitive means. *Health Educ Behav*. 2004;31(2):143-64.
- 370 24. Taiwo BO, Kuti KM, Kuhns LM, Omigbodun O, Awolude O, Adetunji A, et al. Effect of Text Messaging Plus  
371 Peer Navigation on Viral Suppression Among Youth With HIV in the iCARE Nigeria Pilot Study. *J Acquir Immune Defic  
372 Syndr*. 2021;87(4):1086-92.
- 373 25. Kuhns LM, Johnson AK, Adetunji A, Kuti KM, Garofalo R, Omigbodun O, et al. Adaptation of evidence-based  
374 approaches to promote HIV testing and treatment engagement among high-risk Nigerian youth. *PLoS One*.  
375 2021;16(10):e0258190.



- 376 26. Dowshen N, Kuhns LM, Gray C, Lee S, Garofalo R. Feasibility of interactive text message response (ITR) as a  
377 novel, real-time measure of adherence to antiretroviral therapy for HIV+ youth. *AIDS Behav.* 2013;17(6):2237-43.
- 378 27. Federal Ministry of Health Nigeria. National guidelines for HIV prevention, treatment and care. National AIDS  
379 and STIs Control Programme, ; 2020.
- 380 28. Grossberg R, Zhang Y, Gross R. A time-to-prescription-refill measure of antiretroviral adherence predicted  
381 changes in viral load in HIV. *J Clin Epidemiol.* 2004;57(10):1107-10.
- 382 29. McMahon JH, Jordan MR, Kelley K, Bertagnolio S, Hong SY, Wanke CA, et al. Pharmacy adherence measures  
383 to assess adherence to antiretroviral therapy: review of the literature and implications for treatment monitoring. *Clin Infect*  
384 *Dis.* 2011;52(4):493-506.
- 385 30. Finitis DJ, Pellowski JA, Huedo-Medina TB, Fox MC, Kalichman SC. Visual analogue scale (VAS)  
386 measurement of antiretroviral adherence in people living with HIV (PLWH): a meta-analysis. *J Behav Med.*  
387 2016;39(6):1043-55.
- 388 31. Balfour L, Kowal J, Tasca GA, Cooper CL, Angel JB, Macpherson PA, et al. Development and psychometric  
389 validation of the HIV Treatment Knowledge Scale. *AIDS Care.* 2007;19(9):1141-8.
- 390 32. Erlen JA, Cha ES, Kim KH, Caruthers D, Sereika SM. The HIV Medication Taking Self-efficacy Scale:  
391 psychometric evaluation. *J Adv Nurs.* 2010;66(11):2560-72.
- 392 33. Wright K, Naar-King S, Lam P, Templin T, Frey M. Stigma scale revised: reliability and validity of a brief  
393 measure of stigma for HIV+ youth. *J Adolesc Health.* 2007;40(1):96-8.
- 394 34. Richardson LP, McCauley E, Grossman DC, McCarty CA, Richards J, Russo JE, et al. Evaluation of the Patient  
395 Health Questionnaire-9 Item for detecting major depression among adolescents. *Pediatrics.* 2010;126(6):1117-23.
- 396 35. Humeniuk R. Validation of the alcohol, smoking and substance involvement screening test (ASSIST) and pilot  
397 brief intervention: A technical report of phase II findings of the WHO ASSIST project. Geneva, Switzerland: World  
398 Health Organization; 2006.
- 399 36. Attkisson CC GT. Client satisfaction questionnaire-8 and service satisfaction scale-30. In: Maruish ME e, editor.  
400 *The Use of Psychological Testing for Treatment Planning and Outcome Assessment.* Hillsdale, NJ: Lawrence Erlbaum  
401 Associates, Inc; 1994. p. 402–20.
- 402 37. Proctor E, Silmere H, Raghavan R, Hovmand P, Aarons G, Bunger A, et al. Outcomes for implementation  
403 research: conceptual distinctions, measurement challenges, and research agenda. *Adm Policy Ment Health.*  
404 2011;38(2):65-76.
- 405 38. Damschroder LJ, Aron DC, Keith RE, Kirsh SR, Alexander JA, Lowery JC. Fostering implementation of health  
406 services research findings into practice: a consolidated framework for advancing implementation science. *Implement Sci.*  
407 2009;4:50.
- 408 39. Tanner MR, Bush T, Nesheim SR, Weidle PJ, Byrd KK. Retention in Medical Care Among Insured Children with  
409 Diagnosed HIV Infection - United States, 2010-2014. *MMWR Morb Mortal Wkly Rep.* 2017;66(39):1033-8.
- 410 40. Vollmer WM, Xu M, Feldstein A, Smith D, Waterbury A, Rand C. Comparison of pharmacy-based measures of  
411 medication adherence. *BMC Health Serv Res.* 2012;12:155.
- 412 41. Kahana SY, Rohan J, Allison S, Frazier TW, Drotar D. A meta-analysis of adherence to antiretroviral therapy and  
413 virologic responses in HIV-infected children, adolescents, and young adults. *AIDS Behav.* 2013;17(1):41-60.
- 414 42. Ghys PD, Williams BG, Over M, Hallett TB, Godfrey-Faussett P. Epidemiological metrics and benchmarks for a  
415 transition in the HIV epidemic. *PLoS Med.* 2018;15(10):e1002678.
- 416 43. Zandoni BC, Mayer KH. The adolescent and young adult HIV cascade of care in the United States: exaggerated  
417 health disparities. *AIDS Patient Care STDS.* 2014;28(3):128-35.
- 418 44. Zandoni BC, Archary M, Buchan S, Katz IT, Haberer JE. Systematic review and meta-analysis of the adolescent  
419 HIV continuum of care in South Africa: the Cresting Wave. *BMJ Glob Health.* 2016;1(3):e000004.
- 420 45. Antiretroviral therapy cohort collaboration. Survival of HIV-positive patients starting antiretroviral therapy  
421 between 1996 and 2013: a collaborative analysis of cohort studies. *Lancet HIV.* 2017;4(8):e349-e56.
- 422 46. Bavinton BR, Pinto AN, Phanuphak N, Grinsztejn B, Prestage GP, Zablotska-Manos IB, et al. Viral suppression  
423 and HIV transmission in serodiscordant male couples: an international, prospective, observational, cohort study. *Lancet*  
424 *HIV.* 2018;5(8):e438-e47.
- 425 47. Katz IT, Maughan-Brown B. Improved life expectancy of people living with HIV: who is left behind? *Lancet*  
426 *HIV.* 2017;4(8):e324-e6.

SPIRIT 2013 Checklist: Recommended items to address in a clinical trial protocol and related documents\*

| Section/item                      | Item No | Description                                                                                                                                                                                                                                                                              | Addressed on page number |
|-----------------------------------|---------|------------------------------------------------------------------------------------------------------------------------------------------------------------------------------------------------------------------------------------------------------------------------------------------|--------------------------|
| <b>Administrative information</b> |         |                                                                                                                                                                                                                                                                                          |                          |
| Title                             | 1       | Descriptive title identifying the study design, population, interventions, and, if applicable, trial acronym                                                                                                                                                                             | P.1, top of page         |
| Trial registration                | 2a      | Trial identifier and registry name. If not yet registered, name of intended registry                                                                                                                                                                                                     | P.3, bottom of page      |
|                                   | 2b      | All items from the World Health Organization Trial Registration Data Set                                                                                                                                                                                                                 | See ClinicalTrials.gov   |
| Protocol version                  | 3       | Date and version identifier                                                                                                                                                                                                                                                              | P.14, first paragraph    |
| Funding                           | 4       | Sources and types of financial, material, and other support                                                                                                                                                                                                                              | P.14, last paragraph     |
| Roles and responsibilities        | 5a      | Names, affiliations, and roles of protocol contributors                                                                                                                                                                                                                                  | P.1, P.16, top of page   |
|                                   | 5b      | Name and contact information for the trial sponsor                                                                                                                                                                                                                                       | P.14, first paragraph    |
|                                   | 5c      | Role of study sponsor and funders, if any, in study design; collection, management, analysis, and interpretation of data; writing of the report; and the decision to submit the report for publication, including whether they will have ultimate authority over any of these activities | P.14, first paragraph    |
|                                   | 5d      | Composition, roles, and responsibilities of the coordinating centre, steering committee, endpoint adjudication committee, data management team, and other individuals or groups overseeing the trial, if applicable (see Item 21a for data monitoring committee)                         | ____N/A____              |

## Introduction

|                                                           |     |                                                                                                                                                                                                                                                                                                                                                                                |                                            |
|-----------------------------------------------------------|-----|--------------------------------------------------------------------------------------------------------------------------------------------------------------------------------------------------------------------------------------------------------------------------------------------------------------------------------------------------------------------------------|--------------------------------------------|
| Background and rationale                                  | 6a  | Description of research question and justification for undertaking the trial, including summary of relevant studies (published and unpublished) examining benefits and harms for each intervention                                                                                                                                                                             | PP.4-5, "Introduction"                     |
|                                                           | 6b  | Explanation for choice of comparators                                                                                                                                                                                                                                                                                                                                          | P.5, first paragraph                       |
| Objectives                                                | 7   | Specific objectives or hypotheses                                                                                                                                                                                                                                                                                                                                              | P.5, "Study Objectives"                    |
| Trial design                                              | 8   | Description of trial design including type of trial (eg, parallel group, crossover, factorial, single group), allocation ratio, and framework (eg, superiority, equivalence, noninferiority, exploratory)                                                                                                                                                                      | PP.6-7, "Design"                           |
| <b>Methods: Participants, interventions, and outcomes</b> |     |                                                                                                                                                                                                                                                                                                                                                                                |                                            |
| Study setting                                             | 9   | Description of study settings (eg, community clinic, academic hospital) and list of countries where data will be collected. Reference to where list of study sites can be obtained                                                                                                                                                                                             | P.6, first paragraph                       |
| Eligibility criteria                                      | 10  | Inclusion and exclusion criteria for participants. If applicable, eligibility criteria for study centres and individuals who will perform the interventions (eg, surgeons, psychotherapists)                                                                                                                                                                                   | P.6, last paragraph                        |
| Interventions                                             | 11a | Interventions for each group with sufficient detail to allow replication, including how and when they will be administered                                                                                                                                                                                                                                                     | P.7, last paragraph to P.9 first paragraph |
|                                                           | 11b | Criteria for discontinuing or modifying allocated interventions for a given trial participant (eg, drug dose change in response to harms, participant request, or improving/worsening disease)                                                                                                                                                                                 | ___N/A_____                                |
|                                                           | 11c | Strategies to improve adherence to intervention protocols, and any procedures for monitoring adherence (eg, drug tablet return, laboratory tests)                                                                                                                                                                                                                              | P.7, last paragraph to P.9 first paragraph |
|                                                           | 11d | Relevant concomitant care and interventions that are permitted or prohibited during the trial                                                                                                                                                                                                                                                                                  | P.9, first paragraph                       |
| Outcomes                                                  | 12  | Primary, secondary, and other outcomes, including the specific measurement variable (eg, systolic blood pressure), analysis metric (eg, change from baseline, final value, time to event), method of aggregation (eg, median, proportion), and time point for each outcome. Explanation of the clinical relevance of chosen efficacy and harm outcomes is strongly recommended | P.9, last paragraph to P.10                |

|                      |    |                                                                                                                                                                                       |                        |
|----------------------|----|---------------------------------------------------------------------------------------------------------------------------------------------------------------------------------------|------------------------|
| Participant timeline | 13 | Time schedule of enrolment, interventions (including any run-ins and washouts), assessments, and visits for participants. A schematic diagram is highly recommended (see Figure)      | _Figure 1, Table 1_    |
| Sample size          | 14 | Estimated number of participants needed to achieve study objectives and how it was determined, including clinical and statistical assumptions supporting any sample size calculations | P.11, second paragraph |
| Recruitment          | 15 | Strategies for achieving adequate participant enrolment to reach target sample size                                                                                                   | P.6, last paragraph_   |

### Methods: Assignment of interventions (for controlled trials)

#### Allocation:

|                                  |     |                                                                                                                                                                                                                                                                                                                                                          |                       |
|----------------------------------|-----|----------------------------------------------------------------------------------------------------------------------------------------------------------------------------------------------------------------------------------------------------------------------------------------------------------------------------------------------------------|-----------------------|
| Sequence generation              | 16a | Method of generating the allocation sequence (eg, computer-generated random numbers), and list of any factors for stratification. To reduce predictability of a random sequence, details of any planned restriction (eg, blocking) should be provided in a separate document that is unavailable to those who enrol participants or assign interventions | P.7, first paragraph_ |
| Allocation concealment mechanism | 16b | Mechanism of implementing the allocation sequence (eg, central telephone; sequentially numbered, opaque, sealed envelopes), describing any steps to conceal the sequence until interventions are assigned                                                                                                                                                | P.7, first paragraph_ |
| Implementation                   | 16c | Who will generate the allocation sequence, who will enrol participants, and who will assign participants to interventions                                                                                                                                                                                                                                | P.7, first paragraph_ |
| Blinding (masking)               | 17a | Who will be blinded after assignment to interventions (eg, trial participants, care providers, outcome assessors, data analysts), and how                                                                                                                                                                                                                | P.7, first paragraph_ |
|                                  | 17b | If blinded, circumstances under which unblinding is permissible, and procedure for revealing a participant's allocated intervention during the trial                                                                                                                                                                                                     | _N/A_____             |

### Methods: Data collection, management, and analysis

|                         |     |                                                                                                                                                                                                                                                                                                                                                                                                              |                             |
|-------------------------|-----|--------------------------------------------------------------------------------------------------------------------------------------------------------------------------------------------------------------------------------------------------------------------------------------------------------------------------------------------------------------------------------------------------------------|-----------------------------|
| Data collection methods | 18a | Plans for assessment and collection of outcome, baseline, and other trial data, including any related processes to promote data quality (eg, duplicate measurements, training of assessors) and a description of study instruments (eg, questionnaires, laboratory tests) along with their reliability and validity, if known. Reference to where data collection forms can be found, if not in the protocol | P.9, last paragraph to P.10 |
|-------------------------|-----|--------------------------------------------------------------------------------------------------------------------------------------------------------------------------------------------------------------------------------------------------------------------------------------------------------------------------------------------------------------------------------------------------------------|-----------------------------|

|                     |     |                                                                                                                                                                                                                                                                   |                                             |
|---------------------|-----|-------------------------------------------------------------------------------------------------------------------------------------------------------------------------------------------------------------------------------------------------------------------|---------------------------------------------|
|                     | 18b | Plans to promote participant retention and complete follow-up, including list of any outcome data to be collected for participants who discontinue or deviate from intervention protocols                                                                         | P.9, last paragraph to P.10                 |
| Data management     | 19  | Plans for data entry, coding, security, and storage, including any related processes to promote data quality (eg, double data entry; range checks for data values). Reference to where details of data management procedures can be found, if not in the protocol | P.10, last paragraph, P.11, first paragraph |
| Statistical methods | 20a | Statistical methods for analysing primary and secondary outcomes. Reference to where other details of the statistical analysis plan can be found, if not in the protocol                                                                                          | P.10, last paragraph, P.11, first paragraph |
|                     | 20b | Methods for any additional analyses (eg, subgroup and adjusted analyses)                                                                                                                                                                                          | P.10, last paragraph, P.11, first paragraph |
|                     | 20c | Definition of analysis population relating to protocol non-adherence (eg, as randomised analysis), and any statistical methods to handle missing data (eg, multiple imputation)                                                                                   | P.11, first paragraph                       |

#### Methods: Monitoring

|                 |     |                                                                                                                                                                                                                                                                                                                                       |                        |
|-----------------|-----|---------------------------------------------------------------------------------------------------------------------------------------------------------------------------------------------------------------------------------------------------------------------------------------------------------------------------------------|------------------------|
| Data monitoring | 21a | Composition of data monitoring committee (DMC); summary of its role and reporting structure; statement of whether it is independent from the sponsor and competing interests; and reference to where further details about its charter can be found, if not in the protocol. Alternatively, an explanation of why a DMC is not needed | P.14, last paragraph   |
|                 | 21b | Description of any interim analyses and stopping guidelines, including who will have access to these interim results and make the final decision to terminate the trial                                                                                                                                                               | _P.15, top of page     |
| Harms           | 22  | Plans for collecting, assessing, reporting, and managing solicited and spontaneously reported adverse events and other unintended effects of trial interventions or trial conduct                                                                                                                                                     | P.14, last paragraph   |
| Auditing        | 23  | Frequency and procedures for auditing trial conduct, if any, and whether the process will be independent from investigators and the sponsor                                                                                                                                                                                           | _P.10, top of the page |

#### Ethics and dissemination

|                               |     |                                                                                                                                                                                                                                                                                     |                                |
|-------------------------------|-----|-------------------------------------------------------------------------------------------------------------------------------------------------------------------------------------------------------------------------------------------------------------------------------------|--------------------------------|
| Research ethics approval      | 24  | Plans for seeking research ethics committee/institutional review board (REC/IRB) approval                                                                                                                                                                                           | P.14, last paragraph           |
| Protocol amendments           | 25  | Plans for communicating important protocol modifications (eg, changes to eligibility criteria, outcomes, analyses) to relevant parties (eg, investigators, REC/IRBs, trial participants, trial registries, journals, regulators)                                                    | P.14, last paragraph           |
| Consent or assent             | 26a | Who will obtain informed consent or assent from potential trial participants or authorised surrogates, and how (see Item 32)                                                                                                                                                        | P.9, last paragraph_           |
|                               | 26b | Additional consent provisions for collection and use of participant data and biological specimens in ancillary studies, if applicable                                                                                                                                               | P.9, last paragraph_           |
| Confidentiality               | 27  | How personal information about potential and enrolled participants will be collected, shared, and maintained in order to protect confidentiality before, during, and after the trial                                                                                                | P.9, last paragraph_           |
| Declaration of interests      | 28  | Financial and other competing interests for principal investigators for the overall trial and each study site                                                                                                                                                                       | Included in submission system  |
| Access to data                | 29  | Statement of who will have access to the final trial dataset, and disclosure of contractual agreements that limit such access for investigators                                                                                                                                     | P.15, "availability of data" _ |
| Ancillary and post-trial care | 30  | Provisions, if any, for ancillary and post-trial care, and for compensation to those who suffer harm from trial participation                                                                                                                                                       | ___N/A_____                    |
| Dissemination policy          | 31a | Plans for investigators and sponsor to communicate trial results to participants, healthcare professionals, the public, and other relevant groups (eg, via publication, reporting in results databases, or other data sharing arrangements), including any publication restrictions | P.11, 2 <sup>nd</sup> section_ |
|                               | 31b | Authorship eligibility guidelines and any intended use of professional writers                                                                                                                                                                                                      | ___N/A_____                    |
|                               | 31c | Plans, if any, for granting public access to the full protocol, participant-level dataset, and statistical code                                                                                                                                                                     | P.15, "availability of data"   |

## Appendices

|                            |    |                                                                                                                                                                                                |                                                  |
|----------------------------|----|------------------------------------------------------------------------------------------------------------------------------------------------------------------------------------------------|--------------------------------------------------|
| Informed consent materials | 32 | Model consent form and other related documentation given to participants and authorised surrogates                                                                                             | To be submitted if requested by the journal_____ |
| Biological specimens       | 33 | Plans for collection, laboratory evaluation, and storage of biological specimens for genetic or molecular analysis in the current trial and for future use in ancillary studies, if applicable | __N/A_____                                       |

---

\*It is strongly recommended that this checklist be read in conjunction with the SPIRIT 2013 Explanation & Elaboration for important clarification on the items. Amendments to the protocol should be tracked and dated. The SPIRIT checklist is copyrighted by the SPIRIT Group under the Creative Commons ["Attribution-NonCommercial-NoDerivs 3.0 Unported"](#) license.

| STUDY WEEKS                                | 0-24W  | 25-48W | 49-72W | 73-96W |
|--------------------------------------------|--------|--------|--------|--------|
| TIME PERIOD                                | TIME 1 | TIME 2 | TIME 3 | TIME 4 |
| Cluster 1: IDI/CoMUI (not randomized)      |        |        |        |        |
| Cluster 2: RANDOMIZED (LASUTH, LUTH, NIMR) |        |        |        |        |
| Cluster 3: RANDOMIZED (JUTH, COOH)         |        |        |        |        |

medRxiv preprint doi: <https://doi.org/10.1101/2022.08.22.22279094>; this version posted August 23, 2022. The copyright holder for this preprint (which was not certified by peer review) is the author/funder, who has granted medRxiv a license to display the preprint in perpetuity. This article is a US Government work. It is not subject to copyright under 17 USC 105 and is also made available for use under a CC0 license.

|                                     |  |
|-------------------------------------|--|
| Control (Pre-Intervention) Phase    |  |
| Intervention Phase                  |  |
| Follow-up (Post-Intervention) Phase |  |

Figure 2
